1 **A pesticide paradox: Fungicides indirectly increase fungal infections**

2

3 **Authors:** Jason R. Rohr<sup>a,e</sup>, Jenise Brown<sup>a,f</sup>, William A. Battaglin<sup>b</sup>, Taegan A.

4 McMahan<sup>c</sup>, Rick A. Relyea<sup>d</sup>,

5

6 **Affiliations:**

7 <sup>a</sup>University of South Florida, Department of Integrative Biology, Tampa, FL 33620, USA

8 <sup>b</sup>US Geological Survey, Colorado Water Science Center, Lakewood, CO, USA

9 <sup>c</sup>University of Tampa, Department of Biology, Tampa, FL 33606, USA

10 <sup>d</sup>Department of Biological Sciences, Rensselaer Polytechnic Inst., Troy, NY 12180, USA

11 <sup>e</sup>corresponding author, [jasonrohr@gmail.com](mailto:jasonrohr@gmail.com)

12 <sup>f</sup>equal first author

13

14 **Running Title:** Fungicides indirectly increase fungal infections

15

16 **Abstract.** There are many examples where the use of chemicals have had profound  
17 unintended consequences, such as fertilizers reducing crop yields (paradox of  
18 enrichment) and insecticides increasing insect pests (by reducing natural biocontrol).  
19 Recently, the application of agrochemicals, such as agricultural disinfectants and  
20 fungicides, has been explored as an approach to curb the pathogenic fungus,  
21 *Batrachochytrium dendrobatidis* (*Bd*), which is associated with worldwide amphibian  
22 declines. However, the long-term, net effects of early-life exposure to these chemicals on  
23 amphibian disease risk have not been thoroughly investigated. Using a combination of  
24 laboratory experiments and analysis of data from the literature, we explored the effects of  
25 fungicide exposure on *Bd* infections in two frog species. Extremely low concentrations of  
26 the fungicides azoxystrobin, chlorothalonil, and mancozeb were directly toxic to *Bd* in  
27 culture. However, estimated environmental concentrations of the fungicides did not  
28 reduce *Bd* on Cuban tree frog (*Osteopilus septentrionalis*) tadpoles exposed  
29 simultaneously to any of these fungicides and *Bd*, and fungicide exposure actually  
30 increased *Bd*-induced mortality. Additionally, exposure to any of these fungicides as  
31 tadpoles resulted in higher *Bd* abundance and greater *Bd*-induced mortality when  
32 challenged with *Bd* post-metamorphosis, an average of 71 days after their last fungicide  
33 exposure. Analysis of data from the literature revealed that previous exposure to the  
34 fungicide itraconazole, which is commonly used to clear *Bd* infections, made the  
35 critically endangered booroolong frog (*Litoria booroolongensis*) more susceptible to *Bd*.  
36 Finally, a field survey revealed that *Bd* prevalence was positively associated with  
37 concentrations of fungicides in ponds. Although fungicides show promise for controlling  
38 *Bd*, these results suggest that, if fungicides do not completely eliminate *Bd* or if *Bd* re-

39 colonizes, exposure to fungicides has the potential to do more harm than good. To ensure  
40 that fungicide applications have the intended consequence of curbing amphibian declines,  
41 researchers must identify which fungicides do not compromise the pathogen resistance  
42 mechanisms of amphibians.

43

44 **Key-words:** *Batrachochytrium salamandrivorans*, agrochemicals, pesticides, biocontrol,  
45 parasite, chytrid fungus

46

#### 47 **Introduction**

48 Synthetic chemicals have had enormous value to society, such as by treating and curing  
49 diseases and revolutionizing agricultural production. However, they can also have  
50 unanticipated consequences (Pimentel et al. 1973). In fact, there are several examples  
51 where applications of chemicals to the environment have had exactly the opposite effects  
52 than were intended. For example, the application of fertilizers can destabilize crop  
53 herbivore dynamics resulting in larger herbivore outbreaks that, in some years, can result  
54 in zero crop yields, a phenomenon called the paradox of enrichment (Rosenzweig 1971).  
55 Similarly, the application of insecticides has, in some cases, actually increased pests by  
56 having more adverse effects on arthropod predators of the pests than on the pests  
57 themselves, thus adversely affecting natural biocontrol (Desneux et al. 2007, Douglas et  
58 al. 2015). Additionally, there are numerous examples where chemicals can have  
59 substantial non-target effects that can disrupt rather than enhance ecosystem functions  
60 and services (McMahon et al. 2012, Halstead et al. 2014, Staley et al. 2014). These

61 examples highlight the need to comprehensively understand the complex effects that  
62 chemicals can have on ecosystems to avoid inadvertent and undesirable ramifications.

63         Recently, several researchers have explored the effects of pesticides on the chytrid  
64 fungus, *Batrachochytrium dendrobatidis* (*Bd*), a pathogen associated with worldwide  
65 amphibian declines (Kilpatrick et al. 2010). For example, studies have explored how *Bd*  
66 is affected by herbicides (Gahl et al. 2011, McMahon et al. 2013, Rohr et al. 2013, Buck  
67 et al. 2015, Jones et al. 2016), insecticides (Davidson et al. 2007, Gaietto et al. 2014,  
68 Buck et al. 2015, Jones et al. 2016), fungicides (Johnson et al. 2003, Woodhams et al.  
69 2012, McMahon et al. 2013, Gaietto et al. 2014, Hudson et al. 2016), and agricultural  
70 disinfectants (Johnson et al. 2003, Bosch et al. 2015). Additionally, many researchers are  
71 exploring biocides as management tools to control *Bd* (Woodhams et al. 2011). For  
72 example, Hanlon et al. (Hanlon et al. 2012) showed that the common agricultural  
73 fungicide thiophanate-methyl cleared frogs of *Bd* and had positive effects on their health,  
74 and Woodhams et al. (Woodhams et al. 2011) highlighted several studies where  
75 fungicides and disinfectants were being explored as management tools. More  
76 specifically, Bosch et al. (2015) successfully eradicated *Bd* from a field site using a  
77 fungicide and an agricultural disinfectant, and Hudson et al. (2016) temporarily reduced  
78 fungal loads on amphibians in the wild using *in situ* exposure to a fungicide. Thus,  
79 chemicals, such as fungicides and disinfectants with fungicidal properties, show exciting  
80 promise for managing amphibian chytridiomycosis. However, the long-term, net effects  
81 of early-life exposure to these chemicals on amphibian disease risk have not been  
82 thoroughly investigated.

83           In addition to intentional exposure to products with fungicidal properties to  
84 manage *Bd*, amphibians are also regularly and unintentionally exposed to fungicides from  
85 direct overspray, drift, and run-off (Maltby et al. 2009, McMahon et al. 2011).  
86 Fungicides have experienced a greater increase in use in the last two decades than  
87 herbicides and insecticides. For example, in the US from 2004-2005, only 2% of all  
88 corn, soybean, and wheat fields were sprayed with fungicides, but this number increased  
89 to nearly 30% by 2009 (Belden et al. 2010). The soybean industry estimates that 60 to  
90 70% of soybean seed planted in 2014 had a fungicide seed treatment, compared to 30% in  
91 2008 and 8% in 1996 ([http://unitedsoybean.org/article/six-things-farmers-should-know-](http://unitedsoybean.org/article/six-things-farmers-should-know-about-seed-treatments/)  
92 [about-seed-treatments/](http://unitedsoybean.org/article/six-things-farmers-should-know-about-seed-treatments/)). Additionally, in the last 15 years in the US, an average of two  
93 new fungicides were registered for use each year, and in 2011 alone, the US  
94 Environmental Protection Agency reviewed the registration of 14 fungicides for 49 new  
95 uses, and all of the 14 fungicides are in use today (Battaglin et al. 2011).

96           Despite the widespread and increasing use of fungicides, there are few studies of  
97 the direct and indirect effects of fungicides on aquatic ecosystems (but see McMahon et  
98 al. 2011, McMahon et al. 2012) compared to the copious research on insecticides and  
99 herbicides (e.g. Relyea 2005, Rohr and Crumrine 2005, Rohr and McCoy 2010). For  
100 instance, a review of the indirect effects of pesticides on aquatic food webs found that  
101 only two out of the 150 research articles written from 1970-2002 addressed the use of a  
102 fungicide (Fleeger et al. 2003). Fungicides also are often very broad spectrum, affecting  
103 common and vital physiological processes, such as cellular respiration and immunity  
104 (Maltby et al. 2009). Additionally, modeling and monitoring suggest that fungicides

105 might accumulate in freshwater habitats to levels above those considered safe for chronic  
106 exposure of some aquatic organisms (Deb et al. 2010).

107 The effects of pesticides on host-parasite interactions in particular can be  
108 extremely complex, having both positive and negative effects. As mentioned, several  
109 studies have shown that fungicides can be directly toxic to *Bd* (Hanlon and Parris 2012,  
110 McMahon et al. 2013). Chemical contaminants can also have negative effects on hosts  
111 by altering host immunity or parasite virulence (Relyea and Hoverman 2006, Rohr et al.  
112 2006a, Jayawardena et al. 2016). Indeed, many pesticides are known to be  
113 immunomodulators (Voccia et al. 1999, Rohr et al. 2008b, Rohr and McCoy 2010, Rohr  
114 et al. 2015) and thus might have unfavorable effects on amphibian disease risk. Given  
115 the complexity of these direct and indirect effects, it is not surprising that studies  
116 exploring the effects of pesticides on *Bd* infections have produced mixed results  
117 (Davidson et al. 2007, Hanlon et al. 2012, McMahon et al. 2013, Buck et al. 2015,  
118 Hanlon et al. 2015, Jones et al. 2016).

119 Ultimately, what must be quantified is the sum of the positive and negative effects  
120 of contaminants to assess an overall or net effect (Rohr et al. 2008a). Additionally, net  
121 effects must be considered across life stages because exposure to chemicals early in life  
122 can have effects that persist into adulthood (e.g. Rohr and Palmer 2005, Rohr et al.  
123 2006b). As an example, although the pesticide atrazine was directly toxic to *Bd* in  
124 culture (McMahon et al. 2013), the net effect of amphibian early-life exposure to this  
125 pesticide was an increase in *Bd*-induced mortality because it had adverse effects on frog  
126 tolerance of infections that occurred later in life (Rohr et al. 2013).

127           Here, we use a combination of experiments and analysis of data from the  
128 literature to explore the net effects of exposure to four common fungicides on *Bd*  
129 infections in two frog species. To test for direct effects, we exposed *Bd* in culture to  
130 three commonly used fungicides each at five ecologically relevant concentrations. To  
131 test for indirect and persistent effects of fungicides, we conducted a laboratory  
132 experiment where tadpoles were exposed to these three fungicides or a control and  
133 challenged with *Bd* during the fungicide exposure period and/or after metamorphosis. To  
134 compare our results on these three fungicides used commonly in agriculture to  
135 itraconazole, the fungicide commonly used to clear amphibians of *Bd* (Garner et al. 2009,  
136 Berger et al. 2010), we analyzed data from the literature on the effects of itraconazole on  
137 susceptibility to *Bd*. Finally, to evaluate the relevance of our results to natural settings,  
138 we tested whether fungicide levels in waterbodies and frog tissues were correlated with  
139 the prevalence of *Bd* infections.

140           We predicted that each fungicide would be directly toxic to *Bd*. Given that most  
141 of these fungicides are documented to suppress immune responses of vertebrates (Colosio  
142 et al. 1996, Corsini et al. 2006, McMahon et al. 2011), we also expected that exposure to  
143 each fungicide would alter amphibian-*Bd* interactions (indirect effect). The direction of  
144 the net effect of fungicide exposure, however, was challenging to predict *a priori*.  
145 Additionally, we predicted that if any fungicide delayed metamorphosis, it would  
146 increase *Bd*-loads on frogs by increasing the amount of time tadpoles were exposed to  
147 this predominantly aquatic fungus.

148

149   **Background on pathogen and fungicides**

150 *Bd* is a pathogenic chytrid fungus that causes chytridiomycosis in many  
151 amphibians. It is a major contributor to global amphibian declines and has been found on  
152 six continents (Kilpatrick et al. 2010). *Bd* infects amphibians by colonizing keratin-  
153 containing body regions, infecting the mouthparts of anuran tadpoles and later spreading  
154 to the skin as the skin becomes keratinized during metamorphosis (McMahon and Rohr  
155 2015). Infection does not usually cause tadpole mortality, but post-metamorphic anurans  
156 can be extremely susceptible to *Bd* (McMahon et al. 2013, Gervasi et al. 2017) because  
157 the infection disrupts osmotic and electrolyte balance that is controlled by their skin,  
158 which can eventually lead to cardiac arrest (Voyles et al. 2009). Cellular immunity is an  
159 important defense against *Bd* and despite *Bd* being immunosuppressive, amphibians can  
160 acquire immunological resistance to *Bd* that overcomes this immunosuppression  
161 (McMahon et al. 2014).

162 Four fungicides were studied here: azoxystrobin, chlorothalonil, mancozeb, and  
163 itraconazole. The first three fungicides rank among the top five in the United States based  
164 on usage (Grube et al. 2011). Azoxystrobin has experienced a recent increase in usage in  
165 the US in the last couple of decades to combat the emergence of soybean rust and is also  
166 used commonly on grain crops (Battaglin et al. 2011). Chlorothalonil is used on a wide  
167 variety of crop species, as well as residential and golf course turf (Caux et al. 1996), and  
168 is the fungicide most commonly used in Latin America, a place where *Bd* effects on  
169 amphibians have been severe (Ghose et al. 2014). Mancozeb is primarily applied to  
170 potatoes to reduce fungal pathogens and is also sprayed on other food crops (Maltby et al.  
171 2009, Grube et al. 2011). Azoxystrobin and chlorothalonil inhibit cellular respiration,  
172 and mancozeb disrupts lipid metabolism (Caux et al. 1996, Maltby et al. 2009, Battaglin



173 et al. 2011), and thus all three chemicals have modes of action that affect vital  
174 physiological processes of many organisms, from bacteria to vertebrate animals. The  
175 half-lives and estimated peak environmental concentrations (based on US EPA EXAMS-  
176 PRZM software) of azoxystrobin, chlorothalonil, and mancozeb are 11-17 d, 1 to 48 h,  
177 and 1-2 d and ~2 ppb, ~164 ppb, and ~58 ppb, respectively.

178 Itraconazole is not heavily used in agriculture but is used in the medical and  
179 veterinary fields and is probably the most commonly used fungicide to clear *Bd*  
180 infections of amphibians (KuKanich 2008, Garner et al. 2009, Berger et al. 2010). Its  
181 mode of action is to inhibit fungal-mediated synthesis of ergosterol, and it can also inhibit  
182 cytochrome P450, which is important in metabolizing potentially toxic compounds  
183 (KuKanich 2008).

184

## 185 **Materials and Methods**

### 186 ***Preparation of Bd inoculum***

187 *Bd* inoculum was prepared by adding 1 mL of *Bd* stock (isolate SRS 812 isolated  
188 from a *Rana catesbeiana* in 2006 captured near the Savannah River Ecology Lab, SC,  
189 USA, passed through culture ~12 times) cultured in 1% tryptone broth, to a 1% tryptone  
190 agar plate. The plates were maintained at 23°C for approximately 1 week to allow *Bd*  
191 proliferation. Plates were inspected microscopically to verify that the zoospores were  
192 viable and then they were then flooded with ultrapure water to suspend the zoospores.  
193 Water from all the plates was homogenized to create the *Bd* positive (*Bd*+) solutions.  
194 Zoospore density was standardized among replicates and concentrations above the target  
195 concentration were diluted with ultrapure water. The *Bd* negative (*Bd*-) solution was

196 created using the same method, except that no *Bd* was added to the 1% tryptone agar  
197 plates.

198

### 199 ***Effects of fungicides on Bd in culture***

200 To test for direct effects of the fungicides on *Bd* in culture, we used methods  
201 developed by McMahon et al. (2013). In a sterile, laminar flow hood, 10-mL glass test  
202 tubes were filled with *Bd*+ solution (total concentration:  $3.8 \times 10^4$  zoospores/mL), 1%  
203 tryptone broth, and one of four fungicide stocks (0.1x, 1.0x, 10x, and 100x EEC of each  
204 of the three fungicides) or two control treatments (water and acetone solvent controls).  
205 Each treatment (concentration of each fungicide) was replicated 5 times for a total of 25  
206 experimental units per fungicide, plus 10 control replicates. Test tubes were maintained at  
207 23°C for 10 d after which *Bd* quantities were quantified by counting a 10- $\mu$ L aliquot of  
208 *Bd* with a hemocytometer.

209

### 210 ***Effects of fungicides on Bd growth on frogs in the laboratory***

211 The objectives of this experiment were to test for (1) the direct effects of  
212 fungicides on amphibians, (2) indirect effects of fungicides mediated by *Bd*, and (3)  
213 persistent effects of fungicide exposure on amphibian susceptibility to *Bd*. To  
214 accomplish these objectives, we collected Cuban tree frog tadpoles (*Osteopilus*  
215 *septentrionalis*) from a pond near the University of South Florida Botanical Gardens  
216 during the month of September 2012. We chose this frog species because it is common  
217 locally but is susceptible to chytrid infections (Rohr et al. 2013). In summary, we  
218 conducted a 4 x 2 x 2 study with exposure to one of four fungicide treatments during

219 larval development (azoxystrobin, chlorothalonil, mancozeb, solvent control) crossed  
220 with *Bd* exposure or not during larval development crossed with *Bd* exposure or not after  
221 metamorphosis (see below; Table S1, Fig. S1).

222 Each individual tadpole was weighed and staged (Gosner 1960) before the start of  
223 the experiment; stages and weights were equally distributed across all treatments.

224 Individual tadpoles were exposed to treatments in a 500-mL glass jar filled with 300 mL  
225 of artificial spring water (ASW, Cohen et al. 1980). Throughout the experiment, animals  
226 were fed fish flakes and Sera Micron *ad libitum*.

227 The four fungicide treatments were an acetone control or the EEC of azoxystrobin  
228 (2.06 µg/L), chlorothalonil (164 µg/L, we used the concentration of 30.0 µg/L), or  
229 mancozeb (57.6 µg/L). The treatments were applied to the water in each jar at the start of  
230 the experiment. These treatments were re-applied with every water change, which  
231 occurred weekly until metamorphosis or up to 12 weeks.

232 The *Bd* exposures occurred during the tadpole stage (simultaneous exposure with  
233 the fungicide treatments), after metamorphosis (delayed exposure; after fungicide  
234 treatments), both during the tadpole stage and after metamorphosis (double exposure;  
235 during and after fungicide treatments), or not at all (sham-exposed during both life  
236 stages). For the tadpole exposures, a 1-mL *Bd* inoculum ( $2.88 \times 10^6$  -  $4.25 \times 10^6$   
237 zoospores/mL) was added to the appropriate jar during weeks 1 and 3 of the experiment.  
238 All animals that were randomly assigned not to receive *Bd* during a given exposure  
239 period received a sham *Bd* exposure (see *Preparation of Bd stocks*).

240 The tadpoles were checked daily for metamorphosis or mortality. All animals that  
241 metamorphosed were swabbed (snout to vent and down each leg 5 times each), weighed,

242 and maintained individually in 1-L plastic deli cups at 23°C. Each post-metamorphic  
243 juvenile frog received vitamin- and mineral-dusted crickets *ad libitum* and weekly  
244 changes of wet papers towel. All animals that died were swabbed, weighed, and  
245 preserved. After 12 weeks, any tadpoles that had not metamorphosed were swabbed  
246 (mouthparts only; see McMahon and Rohr 2015) and euthanized using 0.5% MS-222.  
247 Animals were then weighed, staged, and snout-vent length (SVL) was measured. The  
248 mouthparts were removed and stored in 95% ethanol to later measure *Bd* loads.

249 At week 22, all metamorphic frogs were exposed to either 1mL of *Bd*+ inoculum  
250 ( $1.69 \times 10^6$  zoospores/mL) or 1mL of the *Bd*- inoculum. For animals that were exposed  
251 only to a fungicide or control treatment as tadpoles, this was their first exposure to *Bd*;  
252 for the simultaneous *Bd*-fungicide treatment animals, this was the second *Bd* exposure.  
253 Five weeks after post-metamorphic exposure to *Bd* or the sham inoculum, the right hind  
254 limb (15 times hip to toe) of all frogs were swabbed. To optimize *Bd* growth, all frogs  
255 were moved to 17°C at week 32; all frogs were swabbed (15 times hip to toe) and then  
256 euthanized during week 38 (Fig. 2b).

257 Both swabs and tissues from the mouthparts of tadpoles provided DNA to  
258 quantify *Bd* abundance. *Bd* DNA was amplified through qPCR to calculate *Bd* infection  
259 abundance. All qPCR was performed according to Hyatt et al. (2007), using StepOne™  
260 Real-Time PCR System (qPCRStepOne™).

261 We initially had 10 replicate frogs for each of these 16 treatments (160 frogs  
262 total). However, if a frog was assigned to receive a *Bd* exposure after metamorphosis and  
263 it died before this exposure, the animal was re-assigned to the appropriate treatment. For  
264 example, if a frog was assigned to receive *Bd* exposure both before and after

265 metamorphosis but died before receiving the second *Bd* exposure after metamorphosis, it  
266 was shifted from the double *Bd* exposure treatment to the *Bd* before metamorphosis-only  
267 treatment. Likewise, if a frog was assigned to only receive *Bd* after metamorphosis and it  
268 died before receiving this treatment, it was reassigned to the no *Bd* before or after  
269 metamorphosis treatments. Hence, this had the effect of increasing sample sizes in some  
270 groups while decreasing the sample size in others. Sample sizes ended up as follows:  
271 simultaneous exposure  $n=53$ ; delayed exposure  $n = 35$ ; double exposure  $n=25$ ; sham-  
272 exposure  $n=42$ .

273

#### 274 ***Effects of the fungicide itraconazole on Bd growth on frogs in the laboratory***

275 Itraconazole is probably the most commonly used fungicide to clear frogs of *Bd*  
276 because of the existence of established amphibian application protocols (Garner et al.  
277 2009, Berger et al. 2010) and thus is extremely relevant to the amphibian-*Bd* system. To  
278 evaluate whether itraconazole had similar effects as azoxystrobin, chlorothalonil, and  
279 mancozeb and to provide a test of the effects of fungicides on *Bd* infections by a  
280 completely independent laboratory (adding to the weight of evidence), we searched the  
281 literature for studies that exposed amphibians to itraconazole and then challenged them  
282 with *Bd*. Cashins et al. (2013) conducted a study on the critically endangered booroolong  
283 frogs (*Litoria booroolongensis*) that satisfied this search criteria. In this study, Cashins et  
284 al. had four groups of frogs. On day one of the experiment, Group 1 was exposed to *Bd*  
285 and groups 2-4 were not. On day 30, Groups 1 and 2 were exposed to itraconazole to  
286 clear the initial *Bd* infection and to control for the itraconazole exposure, respectively.  
287 On day 110, Groups 1-3 were exposed to *Bd* and Group 4 received a sham control. On

288 day 179, *Bd* prevalence was quantified. Sample sizes are provided in Cashins et al.  
289 (2013) but were >10 independent frogs per treatment group. In summary, Group 1 was  
290 exposed to itraconazole and *Bd* twice, Group 2 was exposed to itraconazole and *Bd* once,  
291 Group 3 was never exposed to itraconazole but was exposed to *Bd* once, and Group 4 was  
292 not exposed to either itraconazole or *Bd*. Cashins et al. (2013) focused on how previous  
293 exposure to *Bd* affected host resistance upon a second exposure but did not test for the  
294 effects of itraconazole on *Bd* prevalence in their study. This statistical test is described in  
295 the *Data analysis* section below.

296

### 297 ***Effects of the fungicides on Bd prevalence in the field***

298 To investigate for an association between fungicide exposure and *Bd* infections,  
299 we collected water, bed sediment, *Bd*, and frog tissue samples concurrently from 21 sites  
300 in seven states (CA, CO, GA, ID, LA, ME, and OR) in 2009 and 2010 and quantified *Bd*  
301 and fungicide concentrations. Details on the site locations, characteristics, and sampling  
302 design are provided in detail in Battaglin et al. (2016) and Smalling et al. (2015) and thus  
303 and thus are only briefly covered here. Approximately 1 L of water and a stainless steel  
304 scoop of bed sediment were collected from each site to quantify pesticide or pesticide  
305 degradates. One to 15 adult frogs were collected at each site (see Results for details on  
306 frogs species collected) by hand or net and swabbed for *Bd* (Hyatt et al. 2007). The frogs  
307 were euthanized, wrapped in aluminum foil, and then placed in a freezer for later whole-  
308 body analysis of pesticides and pesticide degradates (Battaglin et al. 2016).

309 Filtered water samples were analyzed for a suite of pesticides and pesticide  
310 degradates by extracting onto a solid phase extraction cartridge, spiking the samples with

311 a recovery surrogate, eluting the cartridge with ethyl acetate, adding a deuterated internal  
312 standard, and analyzing the extracts on an Agilent (Santa Clara, CA) 7890 gas  
313 chromatograph coupled to an Agilent 5975 (Folsom, CA) mass spectrometer. Data for all  
314 pesticides were collected in selective ion monitoring mode with each compound having  
315 one quantifier ion and one to two qualifier ions. Wet sediments (10 g) were analyzed  
316 similarly to the water samples with the following exceptions. The sediment was  
317 homogenized with sodium sulfate, extracted using pressurized liquid extraction, dried  
318 over sodium sulfate, reduced, and sulfur was removed by gel permeation  
319 chromatography. Samples were subjected to a clean-up method with 6% deactivated  
320 Florisil. Frog tissue samples were analyzed similarly to the water samples with the  
321 following exceptions. Individual whole frogs (3–5 g) were thawed, homogenized with  
322 sodium sulfate ( $\text{Na}_2\text{SO}_4$ ) using a mortar and pestle, extracted three times with  
323 dichloromethane using pressurized liquid extraction, dried over  $\text{Na}_2\text{SO}_4$ , and reduced to 1  
324 mL. Ten percent by volume of each raw extract was allowed to evaporate to a constant  
325 weight in a fume hood for gravimetric lipid determination to the nearest 0.001 g using a  
326 microbalance. A majority of the lipid was removed using gel permeation chromatography  
327 followed by 6% deactivated Florisil previously activated at 550 °C for 16 h (Battaglin et  
328 al. 2016).

329

### 330 *Data analysis*

331 All statistical analyses were conducted using R statistical software. For the study  
332 that examined *Bd* responses to three fungicides, we conducted analyses on each of the  
333 three fungicides separately. We tested for a relationship between fungicide concentration

334 and *Bd* abundance (rounded zoospore equivalents) using a negative binomial distribution  
335 (function: `glmmadmb`, package: `glmmadmb`). We tested for differences among the  
336 concentrations using a sequential Bonferroni adjustment.

337 For the laboratory study on frogs, we used a generalized linear model with a  
338 binomial error distribution to determine whether the fungicide treatments, *Bd* treatments,  
339 and their interaction significantly affected whether a frog lived or died during the  
340 experiment, and used a factorial ANOVA to evaluate how treatments affected log mass at  
341 and time to metamorphosis. Additionally, we conducted two analyses on *Bd* abundance.  
342 First, we compared the loads of frogs exposed to *Bd* for the first time across fungicide  
343 treatments to see if simultaneous exposure to *Bd* and fungicides resulted in different  
344 fungal loads than early-life exposure to fungicides and later-life exposure to *Bd*. For  
345 frogs exposed simultaneously to *Bd* and fungicide treatments, the response variable was  
346 *Bd* load at metamorphosis or *Bd* load at death if they did not reach metamorphosis. For  
347 frogs exposed to *Bd* after they were exposed to fungicide treatments (i.e. after  
348 metamorphosis), we used the mid-survey (experimental day 155) *Bd* load or *Bd* load at  
349 death if they did not reach the mid-survey swabbing. Second, we compared the *Bd* load  
350 of post-metamorphic frogs receiving their first and second exposures to *Bd* using the mid-  
351 survey swabs. In all analyses treating *Bd* abundance on the frogs as a response, we  
352 included fungicide treatments, timing of *Bd* exposures, their interaction, and initial mass  
353 (unless it was not significant) as fixed effects. We analyzed *Bd* abundance using a zero-  
354 inflated negative binomial model (it was a better fit [AIC=1009] than the negative  
355 binomial model [AIC=1038]; function: `zeroinfl`, package: `pscl`).



356 To test whether the fungicide itraconazole was immunosuppressive to booroolong  
357 frogs in the Cashins et al. (2013) study, we applied a Chi square analysis to their data to  
358 compare *Bd* prevalence of frogs previously exposed to itraconazole or not.

359 Finally, to evaluate how fungicides affected *Bd* infections in the field, we used  
360 multiple regression with a binomial error distribution (function: glm, package stats) to  
361 test how the concentration of fungicides in frog tissues, sediment, and water affected *Bd*  
362 prevalence. We did not analyze *Bd* abundance data because we did not know the time  
363 course of infection for each frog, and thus we conservatively focused on prevalence.  
364 However, we did evaluate whether any differences among frog species in their fungicides  
365 or *Bd* loads could account for any detected patterns between fungicides and *Bd*  
366 prevalence. All *p*-values were calculated using log-likelihood ratio tests (function:  
367 Anova, package: car).

368

## 369 **Results**

### 370 *Effects of fungicides on Bd in culture*

371 Relative to the acetone control, all tested concentrations of azoxystrobin and  
372 chlorothalonil (Concentration:  $X^2=19.96$ ,  $p<0.001$  and  $X^2=15.22$ ,  $p<0.001$ , respectively;  
373 Table 1) and all tested concentrations of mancozeb except the lowest concentration  
374 (Concentration:  $X^2=6.81$ ,  $p=0.009$ ; Table 1) significantly reduced *Bd* abundance in  
375 culture relative to the controls.

376

### 377 *Effects of fungicides on Bd growth on frogs in the laboratory*

378           There were no significant effects of the fungicides, *Bd* treatments, or their  
379 interactions on time to metamorphosis or mass at metamorphosis (Tables S1 & S2). For  
380 the *Bd* analyses, we first tested for an effect of fungicide treatments on *Bd* abundance on  
381 frogs that were exposed to *Bd* for the first time, which included frogs exposed to *Bd* and  
382 the fungicide treatments simultaneously and frogs exposed to fungicide treatments as  
383 tadpoles but to *Bd* an average of 71 days after metamorphosis. In these analyses, frogs  
384 were not all swabbed at the same time because they metamorphosed or died at different  
385 times. Duration of time that *Bd* grew on the frogs was never a significant predictor in the  
386 models ( $X^2=2.97$ ,  $p>0.225$ ). However, whether a frog was swabbed at death was always  
387 a significant predictor ( $p<0.05$ ) because frogs that died from infection had, on average,  
388 more *Bd* than frogs swabbed while alive. Therefore, we included whether a frog was  
389 swabbed at death as a categorical factor rather than time for *Bd* growth in each model.  
390 Initial mass was included in most models because it was generally a negative predictor of  
391 *Bd* intensity.

392           In these analyses, mean *Bd* abundance on frogs never differed significantly among  
393 the three fungicide treatments, regardless of whether *Bd* exposure occurred simultaneous  
394 with the fungicide exposure ( $X^2=2.65$ ,  $p=0.618$ ) or later in life ( $X^2=0.61$ ,  $p=0.961$ ; Table  
395 S3). In addition, exposure to any of the three fungicides resulted in significantly more *Bd*  
396 on frogs compared to frogs exposed to the solvent control (Fungicide main effect:  
397  $p<0.05$ ; Table S3). Hence, we pooled the fungicides together for ease of interpretation  
398 and to increase statistical power. There was no significant effect of the fungicides on *Bd*  
399 abundance when the fungicide and *Bd* exposures occurred simultaneously as tadpoles  
400 (Fig. 1A); however, when the *Bd* exposure occurred after metamorphosis, an average of

401 71 days since the previous exposure to fungicides, the previous fungicide exposure  
402 caused a nearly 3.5-fold increase *Bd* abundance on frogs relative to the solvent controls  
403 (Fungicide x timing of *Bd* exposure:  $X^2=25.98$ ,  $p<0.001$ ; Fig. 1A).

404 We also compared the *Bd* load of post-metamorphic frogs receiving their first and  
405 second exposures to *Bd*. These analyses revealed a significant two-way interaction  
406 between the fungicide treatment and number of *Bd* exposures ( $X^2=15.47$ ,  $p<0.001$ ).  
407 Frogs exposed to fungicide and *Bd* for the first time had higher *Bd* loads than frogs  
408 exposed to solvent and *Bd* for the first time ( $X^2=12.85$ ,  $p=0.002$ ; Fig. 1B, Table S4).  
409 However, the opposite trend occurred on the second exposure. Frogs exposed to  
410 fungicide and *Bd* for the second time had lower *Bd* loads than frogs exposed to the  
411 solvent and *Bd* for the second time, although not significantly so because of low sample  
412 size and high variability in the control ( $X^2=2.95$ ,  $p=0.229$ ; Fig. 1B, Table S4).

413 For the analyses on survival, we conducted binomial survival analyses that  
414 assessed how treatments affected the probabilities of surviving the length of the  
415 experiment. In these analyses, mean mortality of frogs exposed to the three fungicides  
416 never differed, regardless of whether *Bd* exposure occurred simultaneous with the  
417 fungicide exposure ( $X^2=1.33$ ,  $p=0.515$ ), later in life (delayed) ( $X^2=0.23$ ,  $p=0.892$ ), or both  
418 (double exposure;  $X^2=2.35$ ,  $p=0.309$ ). However, for the simultaneous and delayed  
419 exposure treatments, each fungicide caused significantly greater mortality than the  
420 solvent control ( $p<0.04$ ). Hence, we again pooled the fungicides for ease of interpretation  
421 and to increase statistical power.

422 We compared *Bd*-induced mortality in the fungicide versus control treatments for  
423 frogs exposed to *Bd* for the first time. Despite not having significantly more *Bd* than

424 controls, tadpoles exposed simultaneously to fungicide and *Bd* had greater mortality than  
425 tadpoles exposed to solvent, fungicides alone, and *Bd* alone, resulting in a significant  
426 interaction between fungicide and *Bd* treatments (Fungicide\**Bd*:  $X^2=6.47$ ,  $p=0.011$ ; Fig.  
427 2A). A similar but more pronounced pattern was observed when the *Bd* exposure  
428 occurred after metamorphosis, there was significantly greater *Bd*-induced mortality if  
429 frogs were previously exposed to fungicide than solvent control (Fungicide\**Bd*:  $X^2=6.28$ ,  
430  $p=0.012$ ; Fig. 2A).

431 We also compared the *Bd*-induced mortality of post-metamorphic frogs receiving  
432 their first and second exposures to *Bd*. If metamorphs were exposed to *Bd* for the first  
433 time, there was greater *Bd*-induced mortality among frogs previously exposed to  
434 fungicide than solvent control ( $X^2=6.28$ ,  $p=0.012$ , Fig. 2B). However, similar to our *Bd*  
435 abundance results, the opposite trend was observed when metamorphs were exposed to  
436 *Bd* for the second time; there was greater *Bd*-induced mortality among frogs previously  
437 exposed to solvent control than fungicides, although not significantly so ( $X^2=1.51$ ,  
438  $p=0.220$ ; Fig. 2B). This resulted in a significant interaction between fungicide treatment  
439 and number of *Bd* exposures ( $X^2=6.90$ ,  $p=0.009$ ) because there was a significant effect  
440 during the first exposure and not during the second exposure.

441

#### 442 ***Effects of the fungicide itraconazole on Bd growth on frogs in the laboratory***

443 Booroolong frogs previously exposed to itraconazole in the Cashins et al. (2013)  
444 study had significantly higher *Bd* prevalence when exposed to *Bd* later in life (91%,  
445 10/11 frogs) than frogs not previously exposed to itraconazole (50%, 14/28 frogs;  
446  $X^2=5.58$ ,  $p=0.018$ ).

447

448 ***Effects of the fungicides on Bd growth on frogs in the field***

449 Twelve different fungicides were detected in the 21 wetlands that were sampled  
450 (Table S5). The three most common fungicides detected in sediment were pyraclostrobin  
451 (52%), chlorothalonil (33%), and tebuconazole (24%), and the only fungicide detected  
452 from water samples at multiple sites (19%) was azoxystrobin (Table S5). Given the  
453 infrequency in which individual fungicides were detected, we combined fungicide  
454 concentrations for the analyses.

455 A total of 138 frogs were swabbed for *Bd* and also had fungicides quantified from  
456 their tissues. Of these frogs, 54 were positive for *Bd* and 72 had quantifiable levels of  
457 fungicides in their tissues. Only two wetlands had detectable levels of fungicides in the  
458 water column, whereas all but three had detectable levels in sediment (Table S5). Given  
459 how few wetlands had detectable fungicide in the water column, we chose to simply add  
460 the water column and sediment concentrations to reflect overall environmental exposure,  
461 but admit that much of this exposure appears to be through sediment. *Bd* prevalence on  
462 frogs was not significantly related to the concentration of fungicides in frog tissues  
463 ( $X^2=0.03$ ,  $p=0.858$ , Nagelkerke Index=0.001, Fig. 3A), but was positively related to the  
464 concentration of fungicides (sediment plus water) in waterbodies ( $X^2=7.10$ ,  $p=0.008$ ,  
465 Nagelkerke Index=0.069, Fig. 3B). Two genera of frogs were captured, *Pseudacris*  
466 (65%) and *Rana* (35%; Fig. S2). Five species were captured but 65% were just two  
467 species, *Pseudacris regilla* and *P. triseriata* (Fig. S2). Loads of *Bd* were higher for genus  
468 *Pseudacris* than *Rana*, but *Pseudacris* was less likely to be found at sites with high  
469 concentrations of fungicides (Fig. S2). Thus, differences in *Bd* loads across genera do

470 not seem capable of accounting for the detected positive relationship between fungicides  
471 and *Bd* (Fig. 3).

472

## 473 **Discussion**

474       When tadpoles were exposed to both a fungicide and *Bd* simultaneously in the  
475 laboratory, none of the three fungicides affected *Bd* loads on the frogs compared to the  
476 no-fungicide control. In contrast, frogs exposed to *Bd* as metamorphs, an average of 71  
477 days since any fungicide exposure, had significantly greater *Bd* abundance and greater  
478 *Bd*-induced mortality than frogs exposed to the solvent control. The type of applied  
479 fungicide did not matter with all samples exhibiting the same reaction to the three  
480 fungicides, azoxystrobin, chlorothalonil, and mancozeb. Research from a completely  
481 independent laboratory on the critically endangered booroolong frog found exactly the  
482 same results for itraconazole (Cashins et al. 2013), the most commonly used fungicide to  
483 clear frogs of *Bd* (Garner et al. 2009, Berger et al. 2010). Booroolong frogs previously  
484 exposed to itraconazole had significantly greater *Bd* prevalence when challenged with *Bd*  
485 later in life than frogs not previously exposed to itraconazole. Hence, despite four  
486 commonly used fungicides being directly toxic to *Bd* (see Table 1), all paradoxically  
487 increased *Bd* infections by having persistent adverse effects on frog resistance to this  
488 fungal pathogen.

489       Interestingly, the increase in *Bd* abundance and *Bd*-induced mortality associated  
490 with fungicide exposure in our laboratory study was greater if we exposed the frogs to *Bd*  
491 an average of 71 days after the fungicide exposure than if we exposed the frogs to *Bd* and  
492 fungicide simultaneously. This result is probably a product of two factors. First, the

493 culture experiment demonstrated that all three tested fungicides are directly toxic to *Bd*  
494 and thus almost certainly reduced the abundance of *Bd* on frogs when the two occurred  
495 simultaneously. However, any direct toxicity to *Bd* was clearly not as strong as the  
496 adverse effect of the fungicides on the fungal defenses of the frogs. Second, *Bd* is  
497 believed to consume keratin, which is only found on the mouthparts of tadpoles but is  
498 throughout the skin of metamorphs (McMahon and Rohr 2015). Hence, *Bd* might also be  
499 able to proliferate more rapidly after than before metamorphosis, amplifying the  
500 fungicide effect. Given that the fungicides did not affect timing of or size at  
501 metamorphosis, these traits seem unlikely to explain any observed effects.

502 The observed persistent effects of early-life exposure to fungicides on infectious  
503 disease risk are consistent with several previous toxicological studies. Several pesticides  
504 have been shown to cause changes in host-parasite dynamics (Relyea and Hoverman  
505 2006, Rohr et al. 2006a, Rohr and McCoy 2010) and have delayed effects on host  
506 behavior, growth, physiology, and survival (e.g. Rohr and Palmer 2005, Rohr et al.  
507 2006b, Jones et al. 2009, Rohr et al. 2013). Similar to our findings, other studies have  
508 shown that fungicides can be directly toxic to *Bd* (Hanlon and Parris 2012, McMahon et  
509 al. 2013). In contrast to our work, some of these previous studies revealed that fungicide  
510 exposures can actually reduce *Bd* growth rates on frogs, but these previous studies did not  
511 test for the effects of sequential fungicide and *Bd* exposures and did not test for persistent  
512 adverse effects of early-life exposure to fungicides (Hanlon et al. 2012, Hanlon and Parris  
513 2012, McMahon et al. 2013, Hanlon et al. 2015).

514 There are several potential mechanisms by which early-life exposure to chemicals  
515 can have persistent effects on infectious disease risk. Pesticide exposure early in life can

516 induce stress responses, elevating cortisol, corticosterone, or other stress-related  
517 hormones; chronic levels of these hormones have been associated with persistent  
518 immunomodulation (Martin et al. 2010, McMahon et al. 2011, McMahon et al. 2017).  
519 Chemical contaminants have also been shown to disrupt the microbiome of hosts. The  
520 gut microbiome has been linked to immune development in vertebrates (Hooper et al.  
521 2012) and the skin microbiome in amphibians has been shown to inhibit the growth of *Bd*  
522 (Bletz et al. 2013). Two recent studies revealed that tadpole exposure to chemical  
523 contaminants reduced their gut and skin microbiota and reductions in gut microbiota were  
524 associated with reduced resistance to skin-penetrating gut nematodes and *Bd* later in life  
525 (Knutie et al. in review, Knutie et al. in revisions). Understanding the mechanisms by  
526 which pesticides cause long-term impacts on host defenses will be necessary to improve  
527 the design of pesticides.

528         Interestingly, the pattern of higher *Bd* abundance in fungicide- than solvent-  
529 exposed frogs was not apparent upon a second exposure to *Bd*. Frogs exposed to  
530 fungicides and to *Bd* for the second time had similar *Bd* loads as control frogs and had  
531 lower *Bd* loads than fungicide-exposed frogs exposed to *Bd* for the first time when  
532 exposed at the same life stage (Fig. 1B). This pattern was most likely caused by *Bd*-  
533 induced mortality. Frogs exposed to fungicide and *Bd* for the first time had significantly  
534 higher mortality than frogs exposed to solvent and *Bd* for the first time. In fact, *Bd* only  
535 caused significant mortality when frogs were exposed to fungicides. Hence, the most *Bd*-  
536 susceptible individuals were not available to be exposed to *Bd* for a second time in the  
537 fungicide treatments but were available for exposure to *Bd* a second time in the control  
538 treatment. Consequently, selection is a likely explanation for the change in *Bd*



539 abundance and mortality patterns across fungicide treatments between the first and  
540 second *Bd* exposures (Rohr et al. 2008a).

541         Despite the broad spectrum nature of many fungicides (Maltby et al. 2009), we  
542 did not detect strong direct effects of the tested fungicides on Cuban tree frogs in our  
543 laboratory experiments. The fungicides alone did not affect survival or timing of or size  
544 at metamorphosis. Rather, most of the adverse or beneficial effects of fungicides were  
545 only apparent in the presence of *Bd*. The fungicides reduced *Bd* growth on frogs when  
546 the exposures occurred simultaneously. However, they tended to increase *Bd*-induced  
547 mortality regardless of the timing of exposures. These findings emphasize the  
548 importance of considering the effects of contaminants within a community context  
549 (Relyea and Hoverman 2006, Rohr et al. 2006a), quantifying the net effects of  
550 contaminants (the sum of the beneficial and adverse effects) (Rohr et al. 2008a), and  
551 testing for delayed or persistent effects of chemicals (Rohr and Palmer 2005, Rohr et al.  
552 2006b, Jones et al. 2009, Rohr and Palmer 2013).

553         The patterns we observed in nature were consistent with our laboratory findings  
554 because fungicides were generally associated with greater rather than less *Bd*. In our  
555 field survey, we revealed that the greater the concentration of fungicides in a given  
556 wetland, the greater the prevalence of chytrid fungal infections in frogs (Fig. 3B). In  
557 contrast, fungicide concentrations at the level of individual frogs were less predictive of  
558 *Bd* prevalence (Fig. 3A), perhaps because of individual-level variation in susceptibility,  
559 exposure, and timing and duration of infections, variation that is reduced at the level of  
560 the wetland. In addition to reflecting current exposure, detectable levels of fungicides in  
561 wetlands must also reflect some level of previous fungicide exposure, which, according

562 to our laboratory experiments, can persistently compromise host resistance to *Bd*.  
563 Importantly, given that *Bd* can be quite persistent in the presence of ample hosts and that  
564 fungicides often degrade rapidly in the environment, exposure to fungicide followed by  
565 exposure to *Bd* is almost certainly more frequent than simultaneous exposure to the two  
566 factors, suggesting that persistent adverse effects of previous fungicide exposure might be  
567 common. Additionally, our field patterns revealed that fungicides were rarely detected in  
568 the water column but were regularly detected in sediments, suggesting that adsorption  
569 might be important for many fungicides and that benthos-dwelling tadpole species might  
570 have higher fungicide exposure than species found more commonly in other  
571 microhabitats. Additional field data and field manipulations would be invaluable in  
572 determining the absolute magnitude of these effects and the specific fungicides that are  
573 driving these patterns.

574         Recently, there have been some exciting findings that suggest applications of  
575 fungicides or disinfectants with fungicidal properties might be an effective tool for  
576 curbing amphibian declines associated with *Bd* (Bosch et al. 2015, Hudson et al. 2016).  
577 Bosch et al. (2015) used fungicides and agricultural disinfectants to successfully eradicate  
578 *Bd* from a field site and Hudson et al. (2016) temporarily reduced fungal loads on  
579 amphibians in the wild using *in situ* exposure to fungicides. However, our results show  
580 that many fungicides can also have adverse effects, such as persistently compromising  
581 amphibian defenses against pathogens. Thus, fungicides might work well if they  
582 completely eliminate *Bd* from the environment and if *Bd* is unlikely to return soon after.  
583 However, if a fungicide application does not eradicate *Bd*, if it does eradicate *Bd* but *Bd*  
584 re-colonizes, or if fungicide-induced suppression of host defenses affects resistance to

585 other virulent pathogens in the environment (bacteria, viruses, macroparasites, protozoa,  
586 etc.), our results suggest that fungicide applications could cause more harm than good.  
587 Indeed, if fungicides and disinfectants do not clear both the frog and environment of *Bd*,  
588 our field results suggest that they can eventually elevate *Bd* prevalence. Additionally,  
589 many broad spectrum pesticides have widespread non-target effects (Jones et al. 2009,  
590 Halstead et al. 2014), but the consequences of fungicide exposure on non-target  
591 organisms are not fully understood. Although fungicides show promise for controlling  
592 *Bd*, the recently discovered chytrid of salamanders *Batrachochytrium salamandrivorans*  
593 (Martel et al. 2013), and perhaps even other emerging fungal diseases, such as those of  
594 bats, bees, corals, and snakes (Allender et al. 2011, Cameron et al. 2011, Warnecke et al.  
595 2012), for all of the reasons just provided, we encourage greater research on and caution  
596 in using fungicides for managing infectious diseases of wildlife. In particular, research is  
597 needed to more concretely identify which fungicides can control fungal pathogens  
598 without compromising host pathogen resistance mechanisms.

599         Although synthetic chemicals provide an enormous value to society, they also  
600 have had many unintended consequences (Pimentel et al. 1973). Examples include the  
601 paradox of enrichment, where fertilizers reduce crop yields (Rosenzweig 1971) and cases  
602 where insecticides cause greater pest outbreaks by reducing natural biocontrol (Desneux  
603 et al. 2007, Douglas et al. 2015). Here, we provided yet another example to this growing  
604 list. Fungicides paradoxically increased fungal loads and fungal-induced mortality of  
605 amphibians. These findings highlight the importance of understanding the role of  
606 multiple simultaneous and sequential stressors in biodiversity declines and disease

607 emergences and the need to comprehensively understand the complex effects that  
608 chemicals can have on ecosystems to avoid inadvertent and undesirable ramifications.

609

## 610 **Acknowledgements**

611 We thank D. L. Calhoun, S. Paschke, and K. Smalling for feedback on this manuscript.

612 This research was supported by grants from the National Science Foundation (EF-

613 1241889), National Institutes of Health (R01GM109499, R01TW010286), US

614 Department of Agriculture (NRI 2006-01370, 2009-35102-0543), and US Environmental

615 Protection Agency (CAREER 83518801) to J.R.R., and The University of Tampa's Dana

616 Faculty Development Grant to T.A.M. The field research was supported by the US

617 Geological Survey's Amphibian Research and Monitoring Initiative. Any use of trade,

618 firm, or product names is for descriptive purposes only and does not imply endorsement

619 by the U.S. Government. W.A.B. did not materially contribute to the model application

620 described in this publication.

621

## 622 **Literature Cited**

623 Allender, M. C., M. Dreslik, S. Wylie, C. Phillips, D. B. Wylie, C. Maddox, M. A.

624 Delaney, and M. J. Kinsel. 2011. *Chrysosporium* sp. infection in eastern  
625 massasauga rattlesnakes. *Emerging Infectious Diseases* **17**:2383-2384.

626 Battaglin, W., K. Smalling, C. Anderson, D. Calhoun, T. Chestnut, and E. Muths. 2016.

627 Potential interactions among disease, pesticides, water quality and adjacent land  
628 cover in amphibian habitats in the United States. *Science of the Total*

629 *Environment* **566**:320-332.

- 630 Battaglin, W. A., M. W. Sandstrom, K. M. Kuivila, D. W. Kolpin, and M. T. Meyer.  
631 2011. Occurrence of azoxystrobin, propiconazole, and selected other fungicides in  
632 US streams, 2005–2006. *Water, Air, & Soil Pollution* **218**:307-322.
- 633 Belden, J., S. McMurry, L. Smith, and P. Reilley. 2010. Acute toxicity of fungicide  
634 formulations to amphibians at environmentally relevant concentrations.  
635 *Environmental Toxicology and Chemistry* **29**:2477-2480.
- 636 Berger, L., R. Speare, A. Pessier, J. Voyles, and L. F. Skerratt. 2010. Treatment of  
637 chytridiomycosis requires urgent clinical trials. *Diseases of Aquatic Organisms*  
638 **92**:165-174.
- 639 Bletz, M. C., A. H. Loudon, M. H. Becker, S. C. Bell, D. C. Woodhams, K. P. Minbiole,  
640 and R. N. Harris. 2013. Mitigating amphibian chytridiomycosis with  
641 bioaugmentation: characteristics of effective probiotics and strategies for their  
642 selection and use. *Ecology Letters* **16**:807-820.
- 643 Bosch, J., E. Sanchez-Tome, A. Fernandez-Loras, J. A. Oliver, M. C. Fisher, and T. W. J.  
644 Garner. 2015. Successful elimination of a lethal wildlife infectious disease in  
645 nature. *Biology Letters* **11**.
- 646 Buck, J. C., J. Hua, W. R. Brogan, III, T. D. Dang, J. Urbina, R. J. Bendis, A. B. Stoler,  
647 A. R. Blaustein, and R. A. Relyea. 2015. Effects of pesticide mixtures on host-  
648 pathogen dynamics of the amphibian chytrid fungus. *PLoS One* **10**.
- 649 Cameron, S. A., J. D. Lozier, J. P. Strange, J. B. Koch, N. Cordes, L. F. Solter, and T. L.  
650 Griswold. 2011. Patterns of widespread decline in North American bumble bees.  
651 *Proceedings of the National Academy of Sciences of the United States of America*  
652 **108**:662-667.

- 653 Cashins, S. D., L. F. Grogan, M. McFadden, D. Hunter, P. S. Harlow, L. Berger, and L.  
654 F. Skerratt. 2013. Prior infection does not improve survival against the amphibian  
655 disease chytridiomycosis. *PLoS One* **8**:e56747.
- 656 Caux, P. Y., R. A. Kent, G. T. Fan, and G. L. Stephenson. 1996. Environmental fate and  
657 effects of chlorothalonil: a Canadian perspective. *Critical Reviews in*  
658 *Environmental Science and Technology* **26**:45-93.
- 659 Cohen, L. M., H. Neimark, and L. K. Eveland. 1980. *Schistosoma mansoni*: Response  
660 of cercariae to a thermal gradient. *Journal of Parasitology* **66**:362-364.
- 661 Colosio, C., W. Barcellini, M. Maroni, D. Alcini, M. Bersani, D. Cavallo, A. Galli, P.  
662 Meroni, R. Pastorelli, G. P. Rizzardi, L. Soleo, and V. Foa. 1996.  
663 Immunomodulatory effects of occupational exposure to mancozeb. *Archives of*  
664 *Environmental Health* **51**:445-451.
- 665 Corsini, E., B. Viviani, S. Birindelli, F. Gilardi, A. Torri, I. Codeca, L. Lucchi, S.  
666 Bartesaghi, C. L. Galli, M. Marinovich, and C. Colosio. 2006. Molecular  
667 mechanisms underlying mancozeb-induced inhibition of TNF-alpha production.  
668 *Toxicology and Applied Pharmacology* **212**:89-98.
- 669 Davidson, C., M. F. Benard, H. B. Shaffer, J. M. Parker, C. O'Leary, J. M. Conlon, and L.  
670 A. Rollins-Smith. 2007. Effects of chytrid and carbaryl exposure on survival,  
671 growth, and skin peptide defenses in foothill yellow-legged frogs. *Environmental*  
672 *Science & Technology* **41**:1771-1776.
- 673 Deb, D., B. A. Engel, J. Harbor, L. Hahn, K. J. Lim, and T. Zhai. 2010. Investigating  
674 potential water quality impacts of fungicides used to combat soybean rust in  
675 Indiana. *Water Air and Soil Pollution* **207**:273-288.

- 676 Desneux, N., A. Decourtye, and J.-M. Delpuech. 2007. The sublethal effects of pesticides  
677 on beneficial arthropods. Pages 81-106 Annual Review of Entomology.
- 678 Douglas, M. R., J. R. Rohr, and J. F. Tooker. 2015. Neonicotinoid insecticide travels  
679 through a soil food chain, disrupting biological control of non-target pests and  
680 decreasing soya bean yield. Journal of Applied Ecology **52**:250-260.
- 681 Fleeger, J. W., K. R. Carman, and R. M. Nisbet. 2003. Indirect effects of contaminants in  
682 aquatic ecosystems. Science of the Total Environment **317**:207-233.
- 683 Gahl, M. K., B. D. Pauli, and J. E. Houlahan. 2011. Effects of chytrid fungus and a  
684 glyphosate-based herbicide on survival and growth of wood frogs (*Lithobates*  
685 *sylvaticus*). Ecological Applications **21**:2521-2529.
- 686 Gaietto, K. M., S. L. Rumschlag, and M. D. Boone. 2014. Effects of pesticide exposure  
687 and the amphibian chytrid fungus on gray treefrog (*Hyla chrysoscelis*)  
688 metamorphosis. Environmental Toxicology and Chemistry **33**:2358-2362.
- 689 Garner, T. W. J., G. Garcia, B. Carroll, and M. C. Fisher. 2009. Using itraconazole to  
690 clear *Batrachochytrium dendrobatidis* infection, and subsequent depigmentation  
691 of *Alytes muletensis* tadpoles. Diseases of Aquatic Organisms **83**:257-260.
- 692 Gervasi, S. S., P. R. Stephens, J. Hua, C. L. Searle, G. Xie, J. Urbina, D. Olson, B. A.  
693 Bancroft, V. Weis, J. I. Hammond, R. A. Relyea, and A. R. Blaustein. 2017.  
694 Linking ecology and epidemiology to understand predictors of multi-host  
695 responses to an emerging pathogen, the amphibian chytrid fungus. PLoS One  
696 **12**:e0167882. doi:10.1371/journal.pone.0167882
- 697

- 698 Ghose, S. L., M. A. Donnelly, J. Kerby, and S. M. Whitfield. 2014. Acute toxicity tests  
699 and meta-analysis identify gaps in tropical ecotoxicology for amphibians.  
700 Environmental Toxicology and Chemistry **33**:2114-2119.
- 701 Gosner, N. 1960. A simplified table for staging anuran embryos and larvae with notes on  
702 identification. Herpetologica **16**:183-190.
- 703 Grube, A., D. Donaldson, T. Kiely, and L. Wu. 2011. Pesticide industry sales and usage:  
704 2006 and 2007 market estimates. U.S. Environmental Protection Agency,  
705 Washington, D.C.
- 706 Halstead, N. T., T. A. McMahon, S. A. Johnson, T. R. Raffel, J. M. Romansic, P. W.  
707 Crumrine, and J. R. Rohr. 2014. Community ecology theory predicts the effects of  
708 agrochemical mixtures on aquatic biodiversity and ecosystem properties. Ecology  
709 Letters **17**:932-941.
- 710 Hanlon, S. M., J. L. Kerby, and M. J. Parris. 2012. Unlikely remedy: Fungicide clears  
711 infection from pathogenic fungus in larval southern leopard frogs (*Lithobates*  
712 *sphenocephalus*). PLoS One **7**.
- 713 Hanlon, S. M., K. J. Lynch, J. L. Kerby, and M. J. Parris. 2015. The effects of a fungicide  
714 and chytrid fungus on anuran larvae in aquatic mesocosms. Environmental  
715 Science and Pollution Research **22**:12929-12940.
- 716 Hanlon, S. M., and M. J. Parris. 2012. The impact of pesticides on the pathogen  
717 *Batrachochytrium dendrobatidis* independent of potential hosts. Archives of  
718 Environmental Contamination and Toxicology **63**:137-143.
- 719 Hooper, L. V., D. R. Littman, and A. J. Macpherson. 2012. Interactions between the  
720 microbiota and the immune system. Science **336**:1268-1273.



- 721 Hudson, M. A., R. P. Young, J. Lopez, L. Martin, C. Fenton, R. McCrea, R. A. Griffiths,  
722 S. Adams, G. Gray, G. Garcia, and A. A. Cunningham. 2016. In-situ itraconazole  
723 treatment improves survival rate during an amphibian chytridiomycosis epidemic.  
724 *Biological Conservation* **195**:37–45.
- 725 Hyatt, A. D., D. G. Boyle, V. Olsen, D. B. Boyle, L. Berger, D. Obendorf, A. Dalton, K.  
726 Kriger, M. Hero, H. Hines, R. Phillott, R. Campbell, G. Marantelli, F. Gleason,  
727 and A. Colling. 2007. Diagnostic assays and sampling protocols for the detection  
728 of *Batrachochytrium dendrobatidis*. *Diseases of Aquatic Organisms* **73**:175-192.
- 729 Jayawardena, U. A., J. R. Rohr, A. N. Navaratne, P. H. Amerasinghe, and R. S.  
730 Rajakaruna. 2016. Combined effects of pesticides and trematode infections on  
731 hourglass tree frog *Polypedates cruciger*. *EcoHealth* **13**:111-122.
- 732 Johnson, M. L., L. Berger, L. Philips, and R. Speare. 2003. Fungicidal effects of chemical  
733 disinfectants, UV light, desiccation and heat on the amphibian chytrid  
734 *Batrachochytrium dendrobatidis*. *Diseases of Aquatic Organisms* **57**:255-260.
- 735 Jones, D. K., T. D. Dang, J. Urbina, R. J. Bendis, J. C. Buck, R. D. Cothran, A. R.  
736 Blaustein, and R. A. Relyea. 2016. Effect of simultaneous amphibian exposure to  
737 pesticides and an emerging fungal pathogen, *Batrachochytrium dendrobatidis*.  
738 *Environmental Science & Technology*.
- 739 Jones, D. K., J. I. Hammond, and R. A. Relyea. 2009. Very highly toxic effects of  
740 endosulfan across nine species of tadpoles: Lag effects and family-level  
741 sensitivity. *Environmental Toxicology and Chemistry* **28**:1939-1945.

- 742 Kilpatrick, A. M., C. J. Briggs, and P. Daszak. 2010. The ecology and impact of  
743 chytridiomycosis: an emerging disease of amphibians. *Trends in Ecology &*  
744 *Evolution* **25**:109-118.
- 745 Knutie, S. A., C. R. Gabor, K. D. Kohl, and J. R. Rohr. in review. Do host-associated gut  
746 microbiota mediate the effect of an herbicide on disease risk in frogs? *Journal of*  
747 *Animal Ecology* **in review**:in review.
- 748 Knutie, S. A., C. L. Wilkinson, K. D. Kohl, and J. R. Rohr. in revisions. Early-life  
749 disruption of host microbiota decreases later-life resistance to infections. *Nature*  
750 *Communications* **in revisions**:in revisions.
- 751 Kukanich, B. 2008. A review of selected systemic antifungal drugs for use in dogs and  
752 cats. *Veterinary Medicine* **103**:41-50.
- 753 Maltby, L., T. C. M. Brock, and P. J. van den Brink. 2009. Fungicide risk assessment for  
754 aquatic ecosystems: Importance of interspecific variation, toxic mode of action,  
755 and exposure regime. *Environmental Science & Technology* **43**:7556-7563.
- 756 Martel, A., A. Spitzen-van der Sluijs, M. Blooi, W. Bert, R. Ducatelle, M. C. Fisher, A.  
757 Woeltjes, W. Bosman, K. Chiers, and F. Bossuyt. 2013. *Batrachochytrium*  
758 *salamandrivorans* sp. nov. causes lethal chytridiomycosis in amphibians.  
759 *Proceedings of the National Academy of Sciences* **110**:15325-15329.
- 760 Martin, L. B., W. A. Hopkins, L. D. Mydlarz, and J. R. Rohr. 2010. The effects of  
761 anthropogenic global changes on immune functions and disease resistance. Pages  
762 129-148 *Year in Ecology and Conservation Biology* 2010.

- 763 McMahon, T. A., R. K. Boughton, L. B. Martin, and J. R. Rohr. 2017. Exposure to the  
764 herbicide atrazine nonlinearly affects tadpole corticosterone levels. *Journal of*  
765 *Herpetology* **in press**:in press.
- 766 McMahon, T. A., N. T. Halstead, S. Johnson, T. R. Raffel, J. M. Romansic, P. W.  
767 Crumrine, R. K. Boughton, L. B. Martin, and J. R. Rohr. 2011. The fungicide  
768 chlorothalonil is nonlinearly associated with corticosterone levels, immunity, and  
769 mortality in amphibians. *Environmental Health Perspectives* **119**:1098-1103.
- 770 McMahon, T. A., N. T. Halstead, S. Johnson, T. R. Raffel, J. M. Romansic, P. W.  
771 Crumrine, and J. R. Rohr. 2012. Fungicide-induced declines of freshwater  
772 biodiversity modify ecosystem functions and services. *Ecology Letters* **15**:714-  
773 722.
- 774 McMahon, T. A., and J. R. Rohr. 2015. Transition of chytrid fungus infection from  
775 mouthparts to hind limbs during amphibian metamorphosis. *EcoHealth* **12**:188-  
776 193.
- 777 McMahon, T. A., J. M. Romansic, and J. R. Rohr. 2013. Nonmonotonic and monotonic  
778 effects of pesticides on the pathogenic fungus *Batrachochytrium dendrobatidis* in  
779 culture and on tadpoles. *Environmental Science & Technology* **47**:7958-7964.
- 780 McMahon, T. A., B. F. Sears, M. D. Venesky, S. M. Bessler, J. M. Brown, K. Deutsch,  
781 N. T. Halstead, G. Lentz, N. Tenouri, S. Young, D. J. Civitello, N. Ortega, J. S.  
782 Fites, L. K. Reinert, L. A. Rollins-Smith, T. R. Raffel, and J. R. Rohr. 2014.  
783 Amphibians acquire resistance to live and dead fungus overcoming fungal  
784 immunosuppression. *Nature* **511**:224-227.

- 785 Pimentel, D., L. E. Hurd, A. C. Bellotti, M. J. Forster, I. N. Oka, O. D. Sholes, and R. J.  
786 Whitman. 1973. Food production and energy crisis. *Science* **182**:443-449.
- 787 R Core Team 2013. R: A language and environment for statistical computing. R  
788 Foundation for Statistical Computing, Vienna, Austria. URL [http://www.R-](http://www.R-project.org/)  
789 [project.org/](http://www.R-project.org/).
- 790 Relyea, R., and J. Hoverman. 2006. Assessing the ecology in ecotoxicology: a review and  
791 synthesis in freshwater systems. *Ecology Letters* **9**:1157-1171.
- 792 Relyea, R. A. 2005. The impact of insecticides and herbicides on the biodiversity and  
793 productivity of aquatic communities. *Ecological Applications* **15**:618-627.
- 794 Rohr, J. R., D. J. Civitello, P. W. Crumrine, N. T. Halstead, A. D. Miller, A. M.  
795 Schotthoefer, C. Stenoien, L. B. Johnson, and V. R. Beasley. 2015. Predator  
796 diversity, intraguild predation, and indirect effects drive parasite transmission.  
797 *Proceedings of the National Academy of Sciences of the United States of America*  
798 **112**:3008-3013.
- 799 Rohr, J. R., and P. W. Crumrine. 2005. Effects of an herbicide and an insecticide on pond  
800 community structure and processes. *Ecological Applications* **15**:1135-1147.
- 801 Rohr, J. R., J. L. Kerby, and A. Sih. 2006a. Community ecology as a framework for  
802 predicting contaminant effects. *Trends in Ecology & Evolution* **21**:606-613.
- 803 Rohr, J. R., and K. A. McCoy. 2010. A qualitative meta-analysis reveals consistent  
804 effects of atrazine on freshwater fish and amphibians. *Environmental Health*  
805 *Perspectives* **18**:20-32.

- 806 Rohr, J. R., and B. D. Palmer. 2005. Aquatic herbicide exposure increases salamander  
807 desiccation risk eight months later in a terrestrial environment. *Environmental*  
808 *Toxicology and Chemistry* **24**:1253-1258.
- 809 Rohr, J. R., and B. D. Palmer. 2013. Climate change, multiple stressors, and the decline  
810 of ectotherms. *Conservation Biology* **27**:741-751.
- 811 Rohr, J. R., T. R. Raffel, N. T. Halstead, T. A. McMahon, S. A. Johnson, R. K.  
812 Boughton, and L. B. Martin. 2013. Early-life exposure to a herbicide has enduring  
813 effects on pathogen-induced mortality. *Proceedings of the Royal Society B-*  
814 *Biological Sciences* **280**:20131502.
- 815 Rohr, J. R., T. R. Raffel, S. K. Sessions, and P. J. Hudson. 2008a. Understanding the net  
816 effects of pesticides on amphibian trematode infections. *Ecological Applications*  
817 **18**:1743-1753.
- 818 Rohr, J. R., T. Sager, T. M. Sesterhenn, and B. D. Palmer. 2006b. Exposure,  
819 postexposure, and density-mediated effects of atrazine on amphibians: Breaking  
820 down net effects into their parts. *Environmental Health Perspectives* **114**:46-50.
- 821 Rohr, J. R., A. M. Schotthoefer, T. R. Raffel, H. J. Carrick, N. Halstead, J. T. Hoverman,  
822 C. M. Johnson, L. B. Johnson, C. Lieske, M. D. Piwoni, P. K. Schoff, and V. R.  
823 Beasley. 2008b. Agrochemicals increase trematode infections in a declining  
824 amphibian species. *Nature* **455**:1235-1239.
- 825 Rosenzweig, M. I. 1971. Paradox of enrichment: Destabilization of exploitation  
826 ecosystems in ecological time. *Science* **171**:385-387.
- 827 Smalling, K. L., R. Reeves, E. Muths, M. Vandever, W. A. Battaglin, M. L. Hladik, and  
828 C. L. Pierce. 2015. Pesticide concentrations in frog tissue and wetland habitats in

829 a landscape dominated by agriculture. *Science of the Total Environment* **502**:80-  
830 90.

831 Staley, Z. R., J. R. Rohr, J. K. Senkbeil, and V. J. Harwood. 2014. Agrochemicals  
832 indirectly increase survival of *E. coli* O157:H7 and indicator bacteria by reducing  
833 ecosystem services. *Ecological Applications* **24**:1945-1953.

834 Voccia, I., B. Blakley, P. Brousseau, and M. Fournier. 1999. Immunotoxicity of  
835 pesticides: a review. *Toxicology and Industrial Health* **15**:119-132.

836 Voyles, J., S. Young, L. Berger, C. Campbell, W. F. Voyles, A. Dinudom, D. Cook, R.  
837 Webb, R. A. Alford, L. F. Skerratt, and R. Speare. 2009. Pathogenesis of  
838 chytridiomycosis, a cause of catastrophic amphibian declines. *Science* **326**:582-  
839 585.

840 Warnecke, L., J. M. Turner, T. K. Bollinger, J. M. Lorch, V. Misra, P. M. Cryan, G.  
841 Wibbelt, D. S. Blehert, and C. K. R. Willis. 2012. Inoculation of bats with  
842 European *Geomyces destructans* supports the novel pathogen hypothesis for the  
843 origin of white-nose syndrome. *Proceedings of the National Academy of Sciences*  
844 of the United States of America **109**:6999-7003.

845 Woodhams, D. C., J. Bosch, C. J. Briggs, S. Cashins, L. R. Davis, A. Lauer, E. Muths, R.  
846 Puschendorf, B. R. Schmidt, B. Sheafor, and J. Voyles. 2011. Mitigating  
847 amphibian disease: strategies to maintain wild populations and control  
848 chytridiomycosis. *Frontiers in Zoology* **8**.

849 Woodhams, D. C., C. C. Geiger, L. K. Reinert, L. A. Rollins-Smith, B. Lam, R. N.  
850 Harris, C. J. Briggs, V. T. Vredenburg, and J. Voyles. 2012. Treatment of  
851 amphibians infected with chytrid fungus: learning from failed trials with

- 852 itraconazole, antimicrobial peptides, bacteria, and heat therapy. Diseases of  
853 Aquatic Organisms **98**:11-25.

**Table 1.** Effects of various concentrations of the fungicides azoxystrobin, chlorothalonil, and mancozeb on the abundance on *Batrachochytrium dendrobatidis* zoospores cultured in welled plates.

| Concentration ( $\mu\text{g/L}$ ) | Mean $\log_{10}$ zoospores/mL <sup>a</sup> | Standard error | Sequential Bonferroni <sup>b</sup> |
|-----------------------------------|--------------------------------------------|----------------|------------------------------------|
| <b>Azoxystrobin</b>               |                                            |                |                                    |
| 0.000                             | 5.65                                       | 0.15           | a                                  |
| 0.002                             | 1.03                                       | 1.03           | b                                  |
| 0.020                             | 0.00                                       | 0.00           | b                                  |
| 0.206                             | 2.27                                       | 0.94           | b                                  |
| 2.060                             | 0.00                                       | 0.00           | b                                  |
| 20.600                            | 0.00                                       | 0.00           | b                                  |
| <b>Chlorothalonil</b>             |                                            |                |                                    |
| 0.000                             | 5.65                                       | 0.15           | a                                  |
| 0.030                             | 0.85                                       | 0.85           | b                                  |
| 0.300                             | 1.04                                       | 1.04           | b                                  |
| 3.000                             | 1.53                                       | 0.95           | b                                  |
| 30.000                            | 1.75                                       | 1.08           | b                                  |
| 300.000                           | 0.00                                       | 0.00           | b                                  |
| <b>Mancozeb</b>                   |                                            |                |                                    |
| 0.000                             | 5.65                                       | 0.15           | a                                  |
| 0.057                             | 4.81                                       | 0.45           | a,b                                |
| 0.570                             | 1.04                                       | 1.04           | b                                  |
| 5.700                             | 3.70                                       | 0.99           | b                                  |
| 57.600                            | 0.00                                       | 0.00           | c                                  |
| 576.000                           | 0.68                                       | 0.68           | c                                  |

<sup>a</sup>These means are from five independent samples per concentration.

<sup>b</sup>Concentrations that do not share a letter are significantly different from one another based on post hoc tests among concentrations within a fungicide.



855 **Figure Legends**

856 **Fig. 1.** Effects of fungicide treatments on mean ( $\pm 1$  SE)  $\log_{10}$  *Batrachochytrium*  
857 *dendrobatidis* (*Bd*) abundance on Cuban tree frogs **A**) exposed to *Bd* for the first time as  
858 tadpoles simultaneous with the fungicide treatments versus for the first time as post-  
859 metamorphic frogs, 71 days after the previous exposure to fungicide treatments  
860 (Fungicide x timing of *Bd* exposure:  $X^2=25.98$ ,  $p<0.001$ ), and **B**) exposed to *Bd* for the  
861 first versus second time as a post-metamorphic frog (Fungicide x number of *Bd*  
862 exposures:  $X^2=15.47$ ,  $p<0.001$ ). There were no statistically significant differences among  
863 the three tested fungicides (azoxystrobin, chlorothalonil, mancozeb) and thus they were  
864 pooled for subsequent analyses to increase statistical power and facilitate visualization.  
865 Numbers next to data points are associated sample sizes (which vary because of mortality  
866 and re-assignment of frogs to appropriate treatments if they died before receiving their  
867 assigned *Bd* exposure; see text for details).

868

869 **Fig. 2.** Mean ( $\pm 95\%$  CI) survival of Cuban tree frogs exposed **A**) to fungicide and  
870 *Batrachochytrium dendrobatidis* (*Bd*) treatments simultaneously as tadpoles (Fungicide x  
871 *Bd*:  $X^2 = 6.47$ ,  $P=0.011$ ) or **B**) to fungicides treatments as tadpoles and then to *Bd* for the  
872 first or second time as a post-metamorphic frog (a mean of 71 days after their last  
873 exposure to fungicide; Fungicide x number of *Bd* exposures:  $X^2 = 6.89$ ,  $P=0.009$ ). There  
874 were no statistically significant differences among the three tested fungicides  
875 (azoxystrobin, chlorothalonil, mancozeb) and thus they were pooled for subsequent  
876 analyses to increase statistical power and facilitate visualization. Numbers next to data  
877 points are associated sample sizes (which vary because of mortality and re-assignment of

878 frogs to appropriate treatments if they died before receiving their assigned *Bd* exposure;  
879 see text for details).

880

881 **Fig. 3.** Relationship between the prevalence of *Batrachochytrium dendrobatidis* (*Bd*)  
882 infections of 138 frogs and the concentration of fungicides in frog tissues ( $\log_{10}(\text{ppb}+1)$ -  
883 transformed,  $X^2=0.03$ ,  $p=0.858$ , **A**) and in wetlands (sediment plus water,  $X^2=7.10$ ,  
884  $p=0.008$ , **B**). Shown are logistic regression plots and associated 95% confidence bands  
885 (shaded).

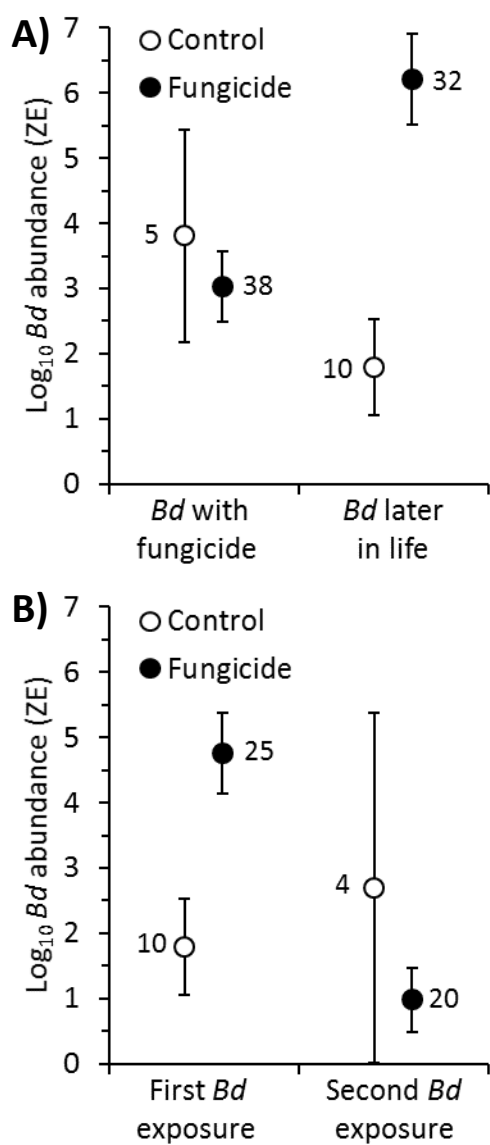

**Figure 1**

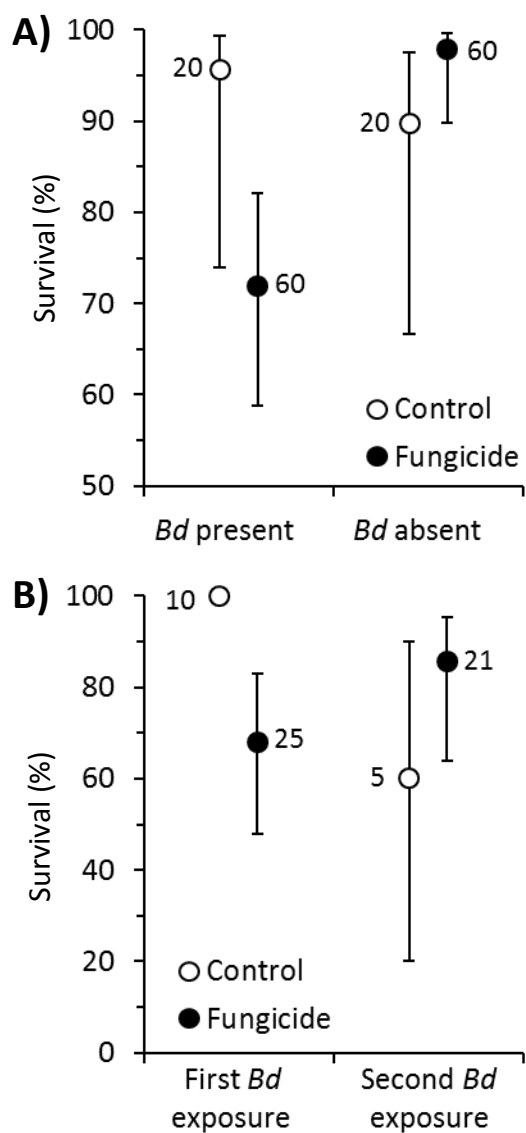

**Figure 2**

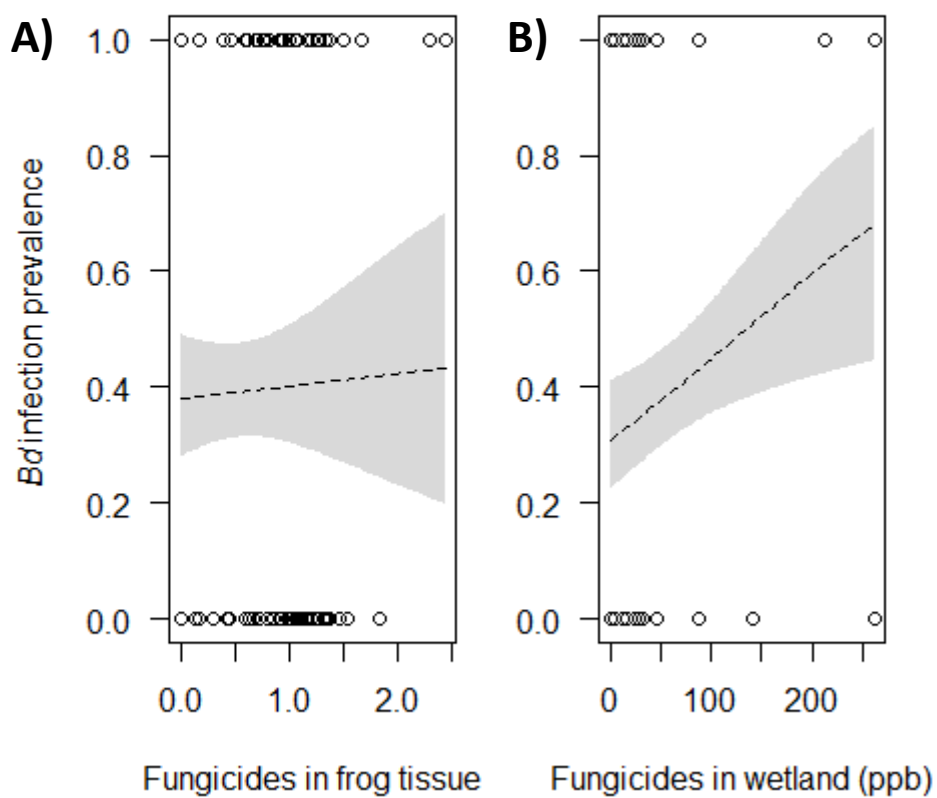

**Figure 3**

## Supplementary Figures

### A). Pre-Metamorphosis:

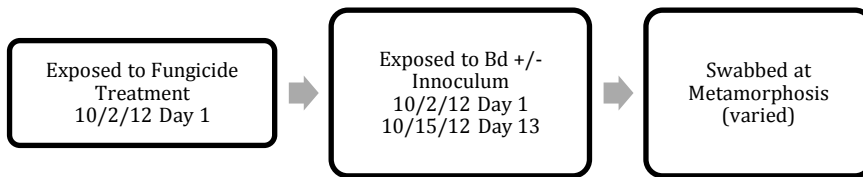

### B). Post-Metamorphosis:

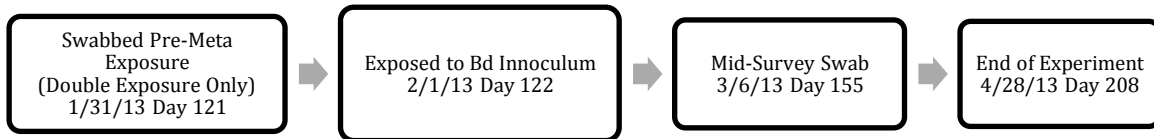

**Fig. S1. Timeline of events in the lab experiment.** **A)** Tadpoles were exposed to a fungicide treatment and *Bd* treatment on day 1 of the experiment. A follow up *Bd* treatment was administered on day 13 with fungicide treatments reapplied weekly. As animals metamorphosed, they were swabbed. Any tadpoles that did not metamorphose by 12/18/12 were euthanized and swabbed. **B)** All animals exposed to *Bd+* inoculum as tadpoles were swabbed pre second exposure to assess *Bd* growth. On day 122 of the experiment all juvenile frogs were exposed to *Bd*. Day 155 all metamorphs were swabbed to assess infections. All animals still alive at the end of the experiment were euthanized and swabbed. When an animal died, regardless of life stage, they were swabbed.

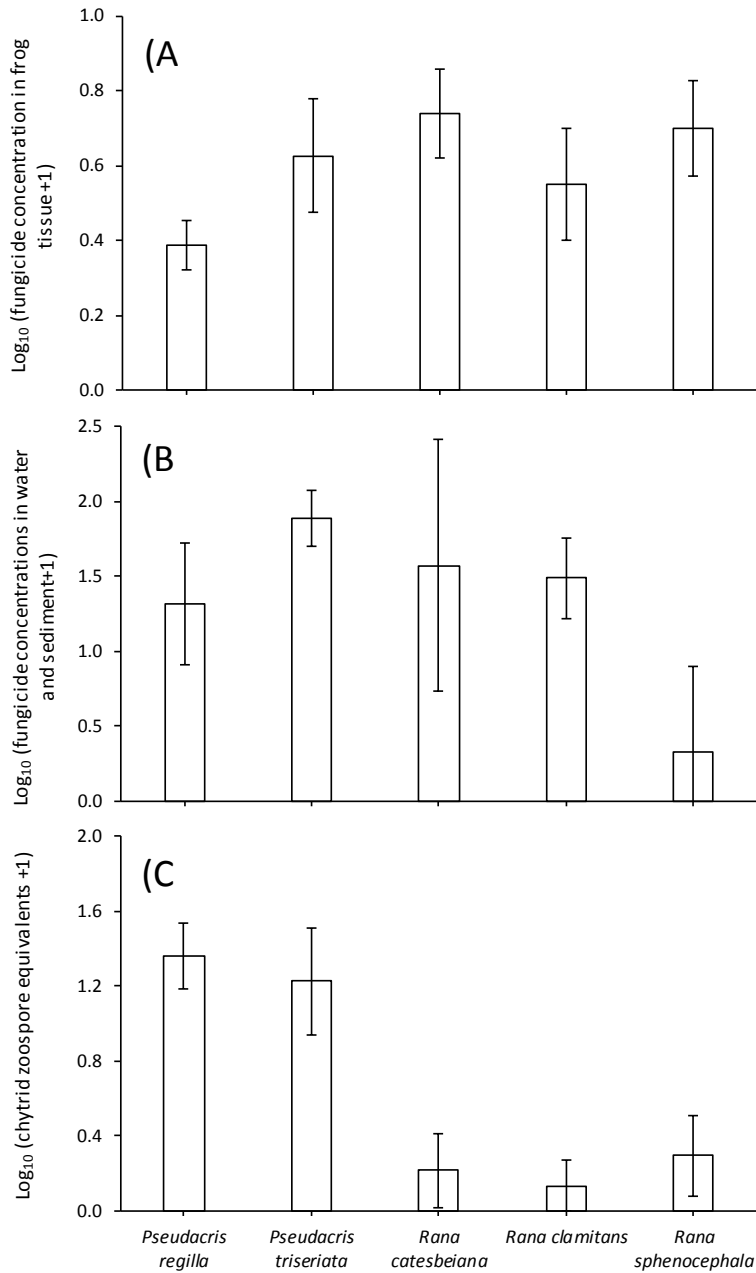

**Fig. S2.** Mean ( $\pm$  1 SE) fungicide concentrations in frog tissues (A) and in wetlands and sediment (B), and mean chytrid fungal loads (C) for the five species of frogs collected in the field study. Sample sizes for *Pseudacris regilla*, *P. triseriata*, *Rana catesbeiana*, *R. clamitans*, and *R. sphenoccephala* are 61, 28, 17, 15, and 17, respectively.

**Table S1.** Effects of exposure to fungicides and *Batrachochytrium dendrobatidis* (Bd) on mean time of metamorphosis and size at metamorphosis in Cuban tree frogs.

| Bd      | Fungicide      | <i>n</i> | Days to metamorphosis |      | Mass at metamorphosis (g) |       |
|---------|----------------|----------|-----------------------|------|---------------------------|-------|
|         |                |          | Mean                  | SE   | Mean                      | SE    |
| Absent  | Control        | 10       | 57.2                  | 6.1  | 0.254                     | 0.013 |
| Absent  | Azoxystrobin   | 5        | 55.4                  | 2.9  | 0.268                     | 0.014 |
| Absent  | Chlorothalonil | 6        | 61.3                  | 6.2  | 0.276                     | 0.039 |
| Absent  | Mancozeb       | 9        | 58.6                  | 4.8  | 0.267                     | 0.016 |
| Present | Control        | 4        | 45.0                  | 11.3 | 0.267                     | 0.016 |
| Present | Azoxystrobin   | 3        | 58.0                  | 13.5 | 0.278                     | 0.056 |
| Present | Chlorothalonil | 7        | 58.1                  | 5.9  | 0.308                     | 0.022 |
| Present | Mancozeb       | 9        | 52.9                  | 4.7  | 0.278                     | 0.022 |



**Table S2:** Statistical results for the effects of exposure to fungicides and *Batrachochytrium dendrobatidis* (Bd) on time of metamorphosis and size at metamorphosis in Cuban tree frogs.

| Effect         | df | Days to metamorphosis |       | Mass at metamorphosis (g) |       |
|----------------|----|-----------------------|-------|---------------------------|-------|
|                |    | F                     | p     | F                         | p     |
| Initial mass   | 1  | 1.05                  | 0.310 | 28.29                     | 0.000 |
| Fungicide      | 3  | 0.32                  | 0.814 | 0.39                      | 0.758 |
| Bd             | 1  | 1.36                  | 0.249 | 0.14                      | 0.713 |
| Fungicide * Bd | 3  | 0.29                  | 0.834 | 1.03                      | 0.388 |

**Table S3.** Effects of fungicide treatments on mean *Batrachochytrium dendrobatidis* (Bd) abundance on Cuban tree frogs when exposed to Bd for the first time as either a tadpole simultaneous with the fungicide exposures or after metamorphosis and after fungicide exposures (i.e. sequential exposures).

| Treatment      | Exposed as a tadpole |                     |      | Exposed after metamorphosis |                     |      |
|----------------|----------------------|---------------------|------|-----------------------------|---------------------|------|
|                | <i>n</i>             | Mean <i>Bd</i> load | SE   | <i>n</i>                    | Mean <i>Bd</i> load | SE   |
| Control        | 5                    | 3.81                | 1.63 | 10                          | 1.79                | 0.74 |
| Azoxystrobin   | 14                   | 4.14                | 0.90 | 10                          | 6.12                | 1.20 |
| Chlorothalonil | 10                   | 3.24                | 1.15 | 8                           | 6.30                | 1.58 |
| Mancozeb       | 14                   | 1.76                | 0.79 | 14                          | 6.22                | 1.08 |

**Table S4.** Effects of fungicide treatments on mean *Batrachochytrium dendrobatidis* (Bd) abundance on postmetamorphic Cuban tree frogs exposed to Bd for the first or second time (i.e as a tadpole and metamorph).

| Treatment      | Exposed to Bd<br>once |      |      | Exposed to Bd<br>twice |      |      |
|----------------|-----------------------|------|------|------------------------|------|------|
|                | Mean <i>Bd</i>        |      |      | Mean <i>Bd</i>         |      |      |
|                | <i>n</i>              | load | SE   | <i>n</i>               | load | SE   |
| Control        | 10                    | 1.79 | 0.74 | 6                      | 5.82 | 2.62 |
| Azoxystrobin   | 10                    | 6.12 | 1.20 | 7                      | 3.23 | 1.82 |
| Chlorothalonil | 8                     | 6.30 | 1.58 | 5                      | 0.94 | 0.94 |
| Mancozeb       | 14                    | 6.22 | 1.08 | 10                     | 1.81 | 1.43 |

**Table S5.** Number of wetlands out of 21 sampled where particular fungicides were detected.

| Fungicide      | Sediment | Water |
|----------------|----------|-------|
| Azoxystrobin   | 2        | 4     |
| Boscalid       | 3        | 1     |
| Chlorothalonil | 7        | 0     |
| Cyprodinil     | 1        | 0     |
| Fludioxinil    | 0        | 1     |
| Imazalil       | 0        | 1     |
| Fenhexamid     | 4        | 0     |
| Propiconazole  | 0        | 1     |
| Pyraclostrobin | 11       | 1     |
| Pyrimethanil   | 2        | 0     |
| Tebuconazole   | 5        | 1     |
| Zoxamide       | 2        | 0     |
